# Supplementary material for: Spatially confined luminescence process in tip-modified heterogeneous-structured microrods for high-level anti-counterfeiting
Source: Royal Society of Chemistry journal article supplement (doi:10.1039/c8cp00363g), 2018-01-01
Supplement: c8cp00363g1.pdf [file c8cp00363g1.pdf]

## Electronic Supplementary Information

### **Spatially Confined Luminescence Process in Tip-modified Heterogeneous-Structured Microrods for High-level Anti-counterfeiting**

Yingdong Han,<sup>‡ab</sup> Chao Gao,<sup>‡bc</sup> Yangbo Wang,<sup>b</sup> Dandan Ju,<sup>a</sup> Aihua Zhou,<sup>a</sup> Feng Song,<sup>\*a</sup> Ling Huang<sup>\*b</sup> and Wei Huang<sup>\*ab</sup>

*<sup>a</sup>School of Physics & The Key Laboratory of Weak Light Nonlinear Photonics , Ministry of Education, Nankai University, Tianjin, 300071, China*

*<sup>b</sup>Key Laboratory of Flexible Electronics (KLOFE) & Institute of Advanced Materials (IAM), Jiangsu National Synergetic Innovation Center for Advanced Materials (SICAM), Nanjing Tech University (NanjingTech), 30 South Puzhu Road, Nanjing 211816, P.R. China*

*<sup>c</sup>Changzhou Vocational Institute of Engineering, Changzhou 213164, China*

*Correspondence should be addressed to F. S. (email: [fsong@nankai.edu.cn](mailto:fsong@nankai.edu.cn)), L. H. (email: [iamlhuang@njtech.edu.cn](mailto:iamlhuang@njtech.edu.cn)) or W. H. (email: [iamwhuang@njtech.edu.cn](mailto:iamwhuang@njtech.edu.cn)).*

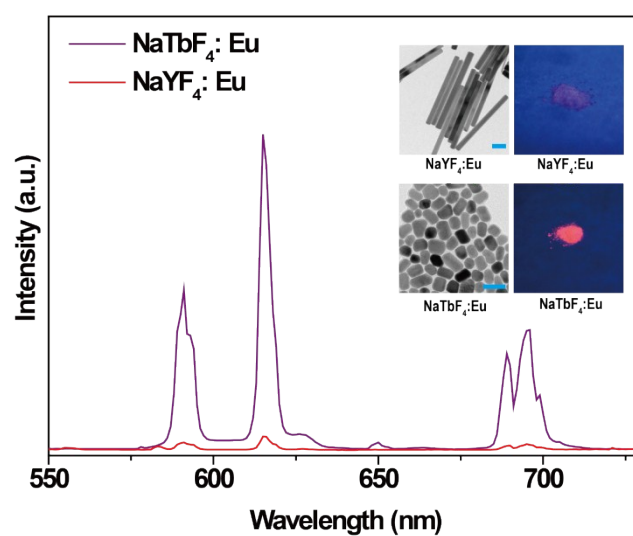

**Fig. S1** The downconversion luminescence spectra of NaTbF<sub>4</sub>:Eu and NaYF<sub>4</sub>:Eu particles under 365 nm wavelength light excitation. The insets show TEM images of NaTbF<sub>4</sub>:Eu (the scale bar is 50 nm ) and NaYF<sub>4</sub>:Eu (the scale bar is 100 nm) rods and their luminescence pictures under 365 nm excitation.

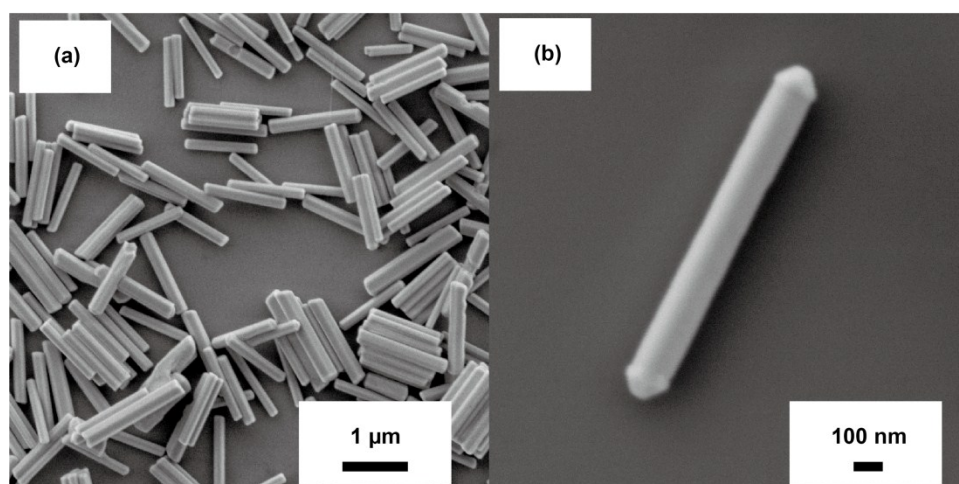

**Fig. S2** TEM images of the as-synthesized samples: (a) ligand –removed NaYF<sub>4</sub>:Yb/Tm and (b) tip-modified NaYF<sub>4</sub>:Yb/Tm@NaTbF<sub>4</sub>:Eu microrod.

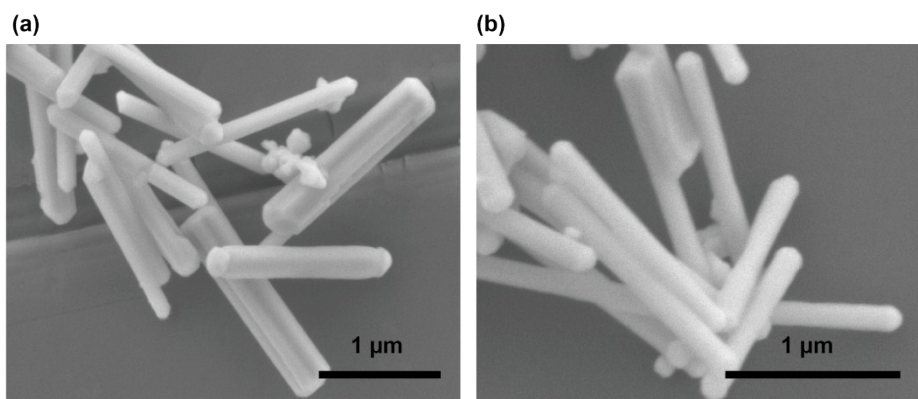

**Fig. S3** TEM images of the as-synthesized (a)  $\text{NaYF}_4\text{:Yb/Er@NaTbF}_4$  samples without adding of EDTA-2Na and (b) tip-modified  $\text{NaYF}_4\text{:Yb/Er@NaTbF}_4\text{:Eu}$  microrods obtained under reaction temperature  $220\text{ }^\circ\text{C}$  for 24h.

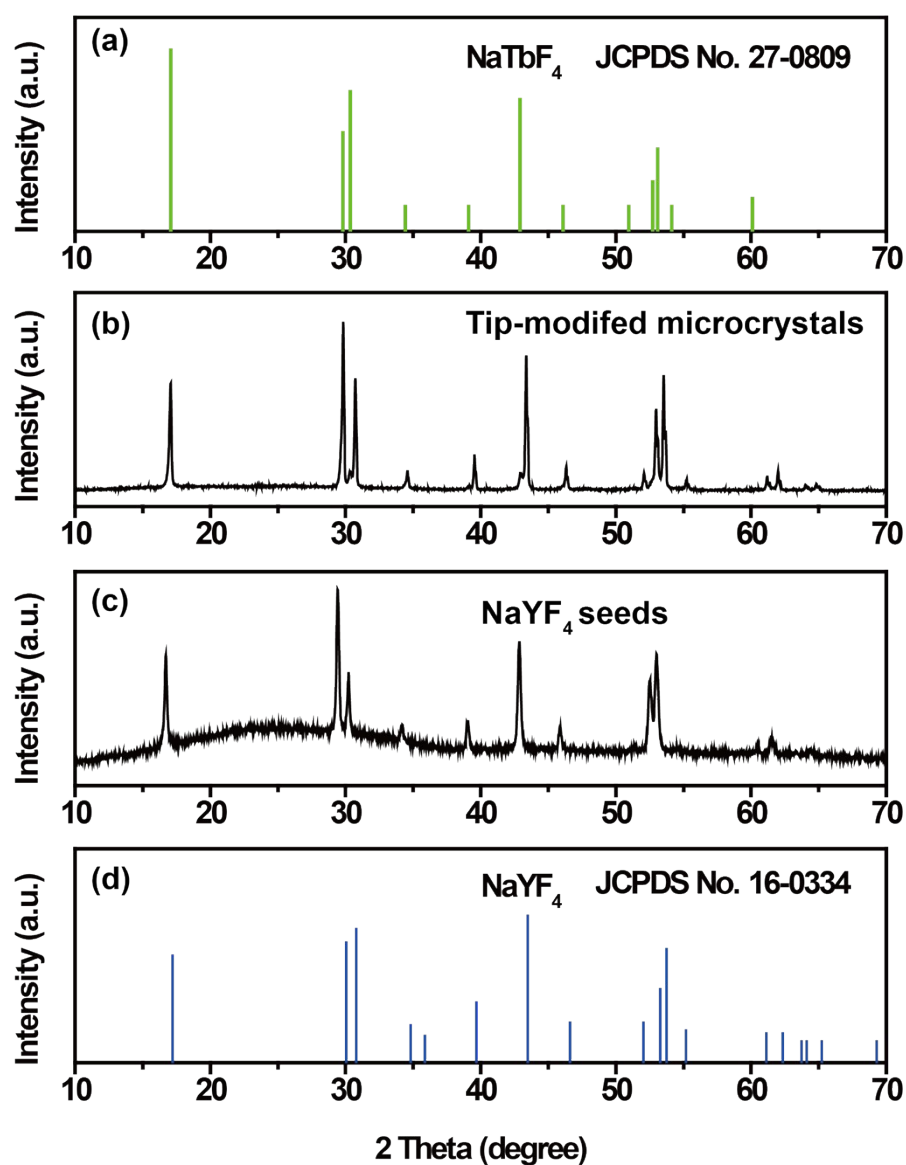

**Fig. S4** (a) Standard XRD patterns of NaTbF<sub>4</sub> (JCPDS: No. 27-0809); (b-c) XRD characterization of the as-prepared tip-modified NaYF<sub>4</sub>@NaTbF<sub>4</sub> microrods and NaYF<sub>4</sub> seeds; (d) Standard XRD patterns of NaYF<sub>4</sub> (JCPDS: No. 16-0334).

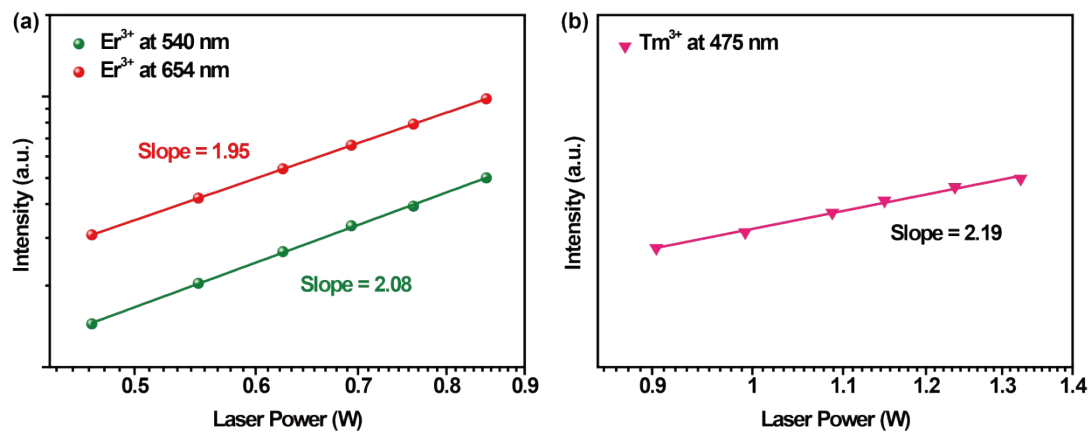

**Fig. S5** Log-log plots of the upconversion emission intensity versus NIR excitation power for 540 nm and 654 nm emissions of  $\text{NaYF}_4:\text{Yb}/\text{Er}@\text{NaTbF}_4:\text{Eu}$  (a) and 475 nm emission of  $\text{NaYF}_4:\text{Yb}/\text{Tm}@\text{NaTbF}_4:\text{Eu}$  (b).
